# Supplementary material for: Antimicrobial resistance and molecular typing of Staphylococcus aureus isolates from raw milk in Hunan Province
Source: PeerJ. 2023 Aug 28;11:e15847. doi: 10.7717/peerj.15847 (PMC10470458; doi:10.7717/peerj.15847)
Supplement: Data S1 [file peerj-11-15847-s002.xlsx]

## Sheet: Antibiotics
Location	Isolates	β-lactams			Lincomyl-macrolide			Tetracycline	Lincomylmacrolide	Quinolones	Vancomycin	Chloramphenicol	Number of genes	Gene spectrum	Resistance to multiplicity	Antibitics-resistant spectrum
		mecA	femA	femB	ermA	ermB	ermC	tetM	aacA-aphD	glrA	VanA	Flor
Changsha	CS-1		√	√		√	√	√	√			√	7	femA-femB-ermB-ermC-tetM-aacAaphD-Flor	4	OFL-ENR-ERY-PEN
	CS-2	√	√	√		√	√	√	√			√	8	mecA-femA-femB-ermB-ermC-tetM-aacAaphD-Flor	4	OFL-ENR-ERY-PEN
	CS-3			√		√	√	√	√			√	6	femB-ermB-ermC-tetM-aacAaphD-Flor	5	OFL-ENR-ERY-PEN-SF
	CS-4		√	√		√	√		√			√	6	femA-femB-ermB-ermC-aacAaphD-Flor	0
	CS-5		√	√		√	√	√	√			√	7	femA-femB-ermB-ermC-tetM-aacAaphD-Flor	1	PEN
	CS-6	√	√	√		√		√	√			√	7	mecA-femA-femB-ermB-tetM-aacAaphD-Flor	0
	CS-7		√	√		√		√	√				5	femA-femB-ermB-tetM-aacAaphD	1	PEN
	CS-8		√	√									2	femA-femB	1	PEN
	CS-9		√	√									2	femA-femB	2	PEN-OFL
	CS-10	√	√	√		√	√		√				6	mecA-femA-femB-ermB-ermC-aacAaphD	1	PEN
	CS-11		√	√									2	femA-femB	2	PEN-OXA
	CS-12		√	√			√					√	4	femA-femB-ermC-Flor	2	PEN-ERY
Changde	CD-1	√	√	√		√	√		√				6	mecA-femA-femB-ermB-ermC-aacAaphD	6	CFX-CLI-ERY-PEN-TIL-GEN
	CD-2	√	√	√		√			√				5	mecA-femA-femB-ermB-aacAaphD	7	CFX-CLI-ERY-PEN-OXA-TIL-GEN
	CD-3		√	√		√	√		√				5	femA-femB-ermB-ermC-aacAaphD	2	PEN-ERY
	CD-4		√	√		√	√	√	√				6	femA-femB-ermB-ermC-tetM-aacAaphD	4	CLI-ERY-A/C-PEN
	CD-5	√		√		√	√		√				5	mecA-femB-ermB-ermC-aacAaphD	7	CFX-CLI-ERY-PEN-OXA-TIL-GEN
	CD-6	√	√	√		√	√		√				6	mecA-femA-femB-ermB-ermC-aacAaphD	8	CFX-CLI-ERY-A/C-PEN-OXA-TIL-GEN
	CD-7	√	√	√		√	√		√			√	7	mecA-femA-femB-ermB-ermC-aacAaphD-Flor	7	CFX-CLI-ERY-A/C-PEN-TIL-GEN
	CD-8		√	√		√	√	√	√				6	femA-femB-ermB-ermC-tetM-aacAaphD	3	CLI-ERY-PEN
	CD-9		√	√		√	√	√	√				6	femA-femB-ermB-ermC-tetM-aacAaphD	2	PEN-FFC
	CD-10		√	√		√	√	√	√				6	femA-femB-ermB-ermC-tetM-aacAaphD	2	PEN-CFX
	CD-11			√		√	√		√			√	5	femB-ermB-ermC-aacAaphD-Flor	2	PEN---------OXA--------
	CD-12	√		√		√	√		√			√	6	mecA-femB-ermB-ermC-aacAaphD-Flor	1	PEN-----------------
	CD-13			√		√	√		√			√	5	femB-ermB-ermC-aacAaphD-Flor	1	PEN-----------------
	CD-14		√	√		√	√	√	√				6	femA-femB-ermB-ermC-tetM-aacAaphD	1	PEN-----------------
	CD-15	√		√		√			√				4	mecA-femB-ermB-aacAaphD	8	PEN--OXA-CLI----CFX-SF---SXT----TIL-GEN-
	CD-16		√	√		√	√	√	√			√	7	femA-femB-ermB-ermC-tetM-aacAaphD-Flor	9	PEN--OXA-CLI---CEF-CFX--OXA--SXT----TIL-GEN-
	CD-17		√	√		√	√		√			√	6	femA-femB-ermB-ermC-aacAaphD-Flor	1	PEN-----------------
	CD-18		√	√		√	√		√			√	6	femA-femB-ermB-ermC-aacAaphD-Flor	1	PEN-----------------
	CD-19		√	√		√	√		√			√	6	femA-femB-ermB-ermC-aacAaphD-Flor	1	PEN-----------------
	CD-20	√	√	√		√	√	√	√				7	mecA-femA-femB-ermB-ermC-tetM-aacAaphD	1	PEN-----------------
	CD-21		√	√		√	√	√	√				6	femA-femB-ermB-ermC-tetM-aacAaphD	9	PEN--OXA-CLI---CEF-CFX--OXA--SXT----TIL-GEN-
	CD-22	√	√	√		√	√	√	√				7	mecA-femA-femB-ermB-ermC-tetM-aacAaphD	8	PEN--OXA-CLI----CFX--OXA--SXT----TIL-GEN-
	CD-23	√		√		√	√		√				5	mecA-femB-ermB-ermC-aacAaphD	8	PEN--OXA-CLI----CFX--OXA--SXT----TIL-GEN-
	CD-24	√	√	√		√	√	√	√				7	mecA-femA-femB-ermB-ermC-tetM-aacAaphD	9	PEN--OXA-CLI----CFX-SF-OXA--SXT----TIL-GEN-
	CD-25		√	√		√	√		√				5	femA-femB-ermB-ermC-aacAaphD	7	PEN--OXA-CLI----CFX----SXT----TIL-GEN-
	CD-26			√		√	√	√	√				5	femB-ermB-ermC-tetM-aacAaphD	8	PEN--OXA-CLI----CFX--OXA--SXT----TIL-GEN-
	CD-27			√		√			√			√	4	femB-ermB-aacAaphD-Flor	1	PEN-----------------
	CD-28			√		√	√	√	√			√	6	femB-ermB-ermC-tetM-aacAaphD-Flor	2	PEN--OXA---------------
	CD-29			√		√	√	√	√			√	6	femB-ermB-ermC-tetM-aacAaphD-Flor	2	PEN--OXA---------------
	CD-30			√		√	√	√	√			√	6	femB-ermB-ermC-tetM-aacAaphD-Flor	1	PEN-----------------
	CD-31		√	√		√	√	√	√				6	femA-femB-ermB-ermC-tetM-aacAaphD	2	PEN-------------FFC----
	CD-32			√		√	√	√	√				5	femB-ermB-ermC-tetM-aacAaphD	1	PEN-----------------
	CD-33	√	√	√									3	mecA-femA-femB	3	PEN-CFX-OXA
	CD-34	√	√	√			√	√	√			√	7	mecA-femA-femB-ermC-tetM-aacAaphD-Flor	6	PEN-ERY-CLI-CFX-OXA-GEN
Shaoyang	SY-1	√	√	√		√	√	√	√			√	8	mecA-femA-femB-ermB-ermC-tetM-aacAaphD-Flor	1	PEN
	SY-2	√		√		√	√		√			√	6	mecA-femB-ermB-ermC-aacAaphD-Flor	0
	SY-3	√	√	√		√	√		√			√	7	mecA-femA-femB-ermB-ermC-aacAaphD-Flor	2	PEN-ERY
	SY-4	√		√		√	√		√			√	6	mecA-femB-ermB-ermC-aacAaphD-Flor	1	PEN
	SY-5	√		√		√	√		√			√	6	mecA-femB-ermB-ermC-aacAaphD-Flor	1	PEN
	SY-6		√	√		√	√		√				5	femA-femB-ermB-ermC-aacAaphD	2	PEN-FFC
	SY-7	√	√	√		√	√		√			√	7	mecA-femA-femB-ermB-ermC-aacAaphD-Flor	1	FFC
	SY-8		√	√		√	√	√	√				6	femA-femB-ermB-ermC-tetM-aacAaphD	7	PEN-CFX-CLI-ERY-OXA-TIL-GEN
	SY-9	√	√	√		√	√		√			√	7	mecA-femA-femB-ermB-ermC-aacAaphD-Flor	0
	SY-10	√	√	√		√	√		√				6	mecA-femA-femB-ermB-ermC-aacAaphD	0
	SY-11	√	√	√									3	mecA-femA-femB	1	PEN
	SY-12	√	√	√		√			√				5	mecA-femA-femB-ermB-aacAaphD	1	PEN
	SY-13	√	√	√									3	mecA-femA-femB	1	PEN
	SY-14	√	√	√		√			√				5	mecA-femA-femB-ermB-aacAaphD	7	PEN-ERY-OXA-Van-TIA-TIL-LZD
	SY-15	√	√	√									3	mecA-femA-femB	0
	SY-16		√	√									2	femA-femB	1
	SY-17	√	√	√									3	mecA-femA-femB	1	PEN
	SY-18	√	√	√		√							4	mecA-femA-femB-ermB	1	PEN
	SY-19	√	√	√									3	mecA-femA-femB	1	PEN
	SY-20		√	√									2	femA-femB	1	PEN
	SY-21		√	√		√							3	femA-femB-ermB	2	PEN-OFL
	SY-22	√	√	√		√							4	mecA-femA-femB-ermB	1	PEN
	SY-23		√	√									2	femA-femB	0
	SY-24		√	√									2	femA-femB	0
	SY-25	√	√	√		√							4	mecA-femA-femB-ermB	0
Yongzhou	YZ-1		√	√		√	√	√	√			√	7	femA-femB-ermB-ermC-tetM-aacAaphD-Flor	3	ERY-FFC-TIL
	YZ-2			√		√	√		√			√	5	femB-ermB-ermC-aacAaphD-Flor	3	FFC-TIA-LZD
Chenzhou	CZ-1	√		√		√	√	√	√			√	7	mecA-femB-ermB-ermC-tetM-aacAaphD-Flor	1	PEN
	CZ-2	√	√	√		√	√	√	√			√	8	mecA-femA-femB-ermB-ermC-tetM-aacAaphD-Flor	1	PEN
	CZ-3			√		√	√	√	√			√	6	femB-ermB-ermC-tetM-aacAaphD-Flor	1	PEN

## Sheet: OS-MRSA
OS-MRSA
CS-2	t934-7735	mecA-femA-femB-ermB-ermC-tetM-aacAaphD-Flor	OFL-ENR-ERY-PEN				Number of resistance	resistant rate
CD-7	t796-7	mecA-femA-femB-ermB-ermC-aacAaphD-Flor	CFX-CLI-ERY-A/C-PEN-TIL-GEN		β-lactams	PEN	19	0.25
CD-1	t796-7	mecA-femA-femB-ermB-ermC-aacAaphD	CFX-CLI-ERY-PEN-TIL-GEN			CFX	2	0.0263158
SY-3	t189-97	mecA-femA-femB-ermB-ermC-aacAaphD-Flor	PEN-ERY			A/C	1	0.0131579
CS-10	t034-398	mecA-femA-femB-ermB-ermC-aacAaphD	PEN			CEF	0	0
CD-12	t796-7756	mecA-femB-ermB-ermC-aacAaphD-Flor	PEN-----------------			OXA	0	0
CD-20	t164-1921	mecA-femA-femB-ermB-ermC-tetM-aacAaphD	PEN-----------------		Sulfonamides	SF	0	0
SY-1	t267-97	mecA-femA-femB-ermB-ermC-tetM-aacAaphD-Flor	PEN			SXT	0	0
SY-4	t267-97	mecA-femB-ermB-ermC-aacAaphD-Flor	PEN		Macrolides	ERY	4	0.0526316
SY-5	t2383-7736	mecA-femB-ermB-ermC-aacAaphD-Flor	PEN			TIL	2	0.0263158
SY-7	t543-479	mecA-femA-femB-ermB-ermC-aacAaphD-Flor	FFC		Quinolones	OFL	1	0.0131579
SY-11	t114-1	mecA-femA-femB	PEN			ENR	1	0.0131579
SY-12	t114-1	mecA-femA-femB-ermB-aacAaphD	PEN		Lincosamides	CLI	2	0.0263158
SY-13	t034-398	mecA-femA-femB	PEN		Tetracyclines	DOX	0	0
SY-17	t189-188	mecA-femA-femB	PEN		Phenicols	FFC	1	0.0131579
SY-18	t359-97	mecA-femA-femB-ermB	PEN		Aminoglycosides	GEN	2	0.0263158
SY-19	t359-97	mecA-femA-femB	PEN		Glycopeptides	Van	0	0
SY-22	t2247-629	mecA-femA-femB-ermB	PEN		Diterpenes	TIA	0	0
CZ-1	t529-705	mecA-femB-ermB-ermC-tetM-aacAaphD-Flor	PEN		Oxazolidinones	LZD	0	0
CZ-2	t529-6	mecA-femA-femB-ermB-ermC-tetM-aacAaphD-Flor	PEN
CS-6	t114-1	mecA-femA-femB-ermB-tetM-aacAaphD-Flor
SY-2	t18636-7757	mecA-femB-ermB-ermC-aacAaphD-Flor
SY-9	t189-188	mecA-femA-femB-ermB-ermC-aacAaphD-Flor
SY-10	t189-188	mecA-femA-femB-ermB-ermC-aacAaphD
SY-15	t7757-1015	mecA-femA-femB
SY-25	t18636-7757	mecA-femA-femB-ermB

## Sheet: OR-MRSA
OR-MRSA
CD-24	t796-ST7	mecA-femA-femB-ermB-ermC-tetM-aacAaphD	PEN--OXA-CLI----CFX-SF-OXA--SXT-TIL-GEN-					Number of resistance	resistant rate
CD-6	t796-ST7	mecA-femA-femB-ermB-ermC-aacAaphD	PEN-ERY-CFX-CLI-A/C-OXA-TIL-GEN			β-lactams	PEN	10	0.131579
CD-15	t796-ST7	mecA-femB-ermB-aacAaphD	PEN--OXA-CLI----CFX-SF---SXT----TIL-GEN-				CFX	9	0.118421
CD-22	t796-ST7	mecA-femA-femB-ermB-ermC-tetM-aacAaphD	PEN--OXA-CLI----CFX--OXA--SXT----TIL-GEN-				A/C	1	0.0131579
CD-23	t796-ST7	mecA-femB-ermB-ermC-aacAaphD	PEN--OXA-CLI----CFX--OXA--SXT----TIL-GEN-				CEF	0	0
CD-2	t796-ST7	mecA-femA-femB-ermB-aacAaphD	PEN-ERYCFX-CLI-OXA-TIL-GEN				OXA	10	0.131579
CD-5	t796-ST7	mecA-femB-ermB-ermC-aacAaphD	PEN-ERY-CFX-CLI-OXA-TIL-GEN			Sulfonamides	SF	2	0.0263158
SY-14	t7295-ST7739	mecA-femA-femB-ermB-aacAaphD	PEN-ERY-OXA-Van-TIA-TIL-LZD	VRSA			SXT	4	0.0526316
CD-33	t796-ST7740	mecA-femA-femB	PEN-ERY-CLI-CFX-OXA			Macrolides	ERY	5	0.0657895
CD-34	t796-ST7740	mecA-femA-femB-ermC-tetM-aacAaphD-Flor	PEN-CFX-OXA				TIL	8	0.105263
						Quinolones	OFL	0	0
			OR-MRSA were all resistant to penicillin and oxacillin, and all were multidrug-resistant bacteria				ENR	0	0
						Lincosamides	CLI	8	0.105263
						Tetracyclines	DOX	0	0
						Phenicols	FFC	0	0
						Aminoglycosides	GEN	7	0.0921053
						Glycopeptides	Van	1	0.0131579
						Diterpenes	TIA	1	0.0131579
						Oxazolidinones	LZD	1	0.0131579

## Sheet: Spa
Isolates	spa gene	Spa type	Repeat succession	Length	Simpson's diversity index(95% CI)
CS-1	√	t934	07-23-12-34-34-34-34-33-34	364	Spa TYPE 20 0.910(0.873-0.946)
CS-2	√	t934	07-23-12-34-34-34-34-33-34	368
CS-3	√	t934	07-23-12-34-34-34-34-33-34	367
CS-4	√	t19817	07-21-16-34	258
CS-5	√	t091	07-23-21-17-34-12-23-02-12-23	398
CS-6	√	t114	07-16-34-33-13	281
CS-7	√	t164	07-06-17-21-34-34-22-34	350
CS-8	√	t034	08-16-02-25-02-25-34-24-25	373
CS-9	√	t034	08-16-02-25-02-25-34-24-25	364
CS-10	√	t034	08-16-02-25-02-25-34-24-25	366
CS-11	√	t034	08-16-02-25-02-25-34-24-25	376
CS-12	√	t2383	08-16'	176
CD-1	√	t796	07-23-21-17-12-23-02-12-23	364
CD-2	√	t796	07-23-21-17-12-23-02-12-23	375
CD-3	√	t091	07-23-21-17-34-12-23-02-12-23	376
CD-4	√	t091	07-23-21-17-34-12-23-02-12-23	397
CD-5	√	t796	07-23-21-17-12-23-02-12-23	366
CD-6	√	t796	07-23-21-17-12-23-02-12-23	362
CD-7	√	t796	07-23-21-17-12-23-02-12-23	363
CD-8	√	t796	07-23-21-17-12-23-02-12-23	373
CD-9	√	t002	26-23-17-34-17-20-17-12-17-16	386
CD-10	√	t796	07-23-21-17-12-23-02-12-23	374
CD-11	√	t091	07-23-21-17-34-12-23-02-12-23	398
CD-12	√	t796	07-23-21-17-12-23-02-12-23	362
CD-13	√	t091	07-23-21-17-34-12-23-02-12-23	403
CD-14	√	t5100	07-21-16-34-33-13	293
CD-15	√	t796	07-23-21-17-12-23-02-12-23	373
CD-16	√	t796	07-23-21-17-12-23-02-12-23	365
CD-17	√	t091	07-23-21-17-34-12-23-02-12-23	398
CD-18	√	t5100	07-21-16-34-33-13	303
CD-19	√	t189	07-23-12-21-17-34	293
CD-20	√	t164	07-06-17-21-34-34-22-34	354
CD-21	√	t796	07-23-21-17-12-23-02-12-23	374
CD-22	√	t796	07-23-21-17-12-23-02-12-23	365
CD-23	√	t796	07-23-21-17-12-23-02-12-23	362
CD-24	√	t796	07-23-21-17-12-23-02-12-23	363
CD-25	√	t796	07-23-21-17-12-23-02-12-23	366
CD-26	√	t796	07-23-21-17-12-23-02-12-23	377
CD-27	√	t359	07-23-12-21-17-34-34-33-34	376
CD-28	√	t359	07-23-12-21-17-34-34-33-34	365
CD-29	√	t359	07-23-12-21-17-34-34-33-34	368
CD-30	√	t359	07-23-12-21-17-34-34-33-34	364
CD-31	√	t091	07-23-21-17-34-12-23-02-12-23	400
CD-32	√	t267	07-23-12-21-17-34-34-34-33-34	398
CD-33	√	t796	07-23-21-17-12-23-02-12-23	377
CD-34	√	t796	07-23-21-17-12-23-02-12-23	363
SY-1	√	t267	07-23-12-21-17-34-34-34-33-34	400
SY-2	√	t18636	121-21-16-34-17-82-24-17-17	376
SY-3	√	t189	07-23-12-21-17-34	273
SY-4	√	t267	07-23-12-21-17-34-34-34-33-34	403
SY-5	√	t2383	08-16'	208
SY-6	√	t543	04-20-17	233
SY-7	√	t543	04-20-17	232
SY-8	√	t2383	08-16'	208
SY-9	√	t189	07-23-12-21-17-34	295
SY-10	√	t189	07-23-12-21-17-34	303
SY-11	√	t114	07-16-34-33-13	282
SY-12	√	t114	07-16-34-33-13	277
SY-13	√	t034	08-16-02-25-02-25-34-24-25	374
SY-14	√	t7295	04-31-17-17	257
SY-15	√	t18636	121-21-16-34-17-82-24-17-17	372
SY-16	√	t189	07-23-12-21-17-34	302
SY-17	√	t189	07-23-12-21-17-34	292
SY-18	√	t359	07-23-12-21-17-34-34-33-34	377
SY-19	√	t359	07-23-12-21-17-34-34-33-34	364
SY-20	√	t359	07-23-12-21-17-34-34-33-34	377
SY-21	√	t2700	07-16-12-23-02-12-23-02-02-34	390
SY-22	√	t2247	26-25-17	232
SY-23	√	t189	07-23-12-21-17-34	302
SY-24	√	t189	07-23-12-21-17-34	302
SY-25	√	t8636	121-21-16-34-17-82-24-17-17	350
YZ-1	√	t529	04-34	209
YZ-2	√	t701	11-10-21-17-34-24-34-22-25-25	389
CZ-1	√	t529	04-34	206
CZ-2	√	t529	04-34	209
CZ-3	√	t529	04-34	209

## Sheet: MLST
Isolates	arcC	aroE	glpF	gmk	pta	tpi	yqiL	ST	Spa	CC	Note	Simpson's diversity index(95% CI)
CS-1	3	1	605	1	1	5	3	7735	t934	97		ST TYPE 22 0.907(0.869-0.946)
CS-2	3	1	605	1	1	5	3	7735	t934	97
CS-3	3	1	605	1	1	5	3	7735	t934	97
CS-4	899	1	1	9	1	1	1	7737	t19817	1	arc391T→C
CS-5	5	4	1	4	4	6	3	7	t091
CS-6	1	1	1	1	1	1	1	1	t114	1
CS-7	4	9	1	8	1	10	218	1921	t164
CS-8	3	35	19	2	20	26	39	398	t034	398
CS-9	3	35	19	2	20	26	39	398	t034	398
CS-10	3	35	19	2	20	26	39	398	t034	398
CS-11	3	35	19	2	20	26	39	398	t034	398
CS-12	5	4	1	4	4	6	3	7	t2383
CD-1	5	4	1	4	4	6	3	7	t796
CD-2	5	4	1	4	4	6	3	7	t796
CD-3	5	1084	1	4	4	6	3	7738	t091		aroE125 A→T
CD-4	5	1084	1	4	4	6	3	7738	t091		aroE125 A→T
CD-5	5	4	1	4	4	6	3	7	t796
CD-6	5	4	1	4	4	6	3	7	t796
CD-7	5	4	1	4	4	6	3	7	t796
CD-8	5	4	1	4	4	6	3	7	t796
CD-9	1	4	1	4	12	1	10	5	t002	5
CD-10	5	4	1	4	4	6	3	7	t796
CD-11	3	1	1	1	1	843	3	7756	t091	97	tpi 33G→A
CD-12	3	1	1	1	1	843	3	7756	t796	97	tpi 33G→A
CD-13	3	1	1	1	1	843	3	7756	t091	97	tpi 33G→A
CD-14	1	1	1	9	1	1	1	81	t5100	1
CD-15	5	4	1	4	4	6	3	7	t796
CD-16	5	4	1	4	4	6	3	7	t796
CD-17	5	1084	1	4	4	6	3	7738	t091		aroE 125A→T
CD-18	1	1	1	9	1	1	1	81	t5100	1
CD-19	3	1	1	8	1	1	1	188	t189	1
CD-20	4	9	1	8	1	10	218	1921	t164
CD-21	5	4	1	4	4	6	3	7	t796
CD-22	5	4	1	4	4	6	3	7	t796
CD-23	5	4	1	4	4	6	3	7	t796
CD-24	5	4	1	4	4	6	3	7	t796
CD-25	5	4	1	4	4	6	3	7	t796
CD-26	5	4	1	4	4	6	3	7	t796
CD-27	3	1	1	1	1	5	3	97	t359	97
CD-28	3	1	1	1	1	5	3	97	t359	97
CD-29	3	1	1	1	1	5	3	97	t359	97
CD-30	3	1	1	1	1	5	3	97	t359	97
CD-31	5	4	1	4	4	6	3	7	t091
CD-32	3	1	1	1	1	5	3	97	t267	97
CD-33	5	4	1	599	4	6	3	7740	t796		gmk 86A→C
CD-34	5	4	1	599	4	6	3	7740	t796		gmk 86A→C
SY-1	3	1	1	1	1	5	3	97	t267	97
SY-2	6	125	213	27	13	13	1015	7757	t18636		yqiL 308C→G
SY-3	3	1	1	1	1	5	3	97	t189	97
SY-4	3	1	1	1	1	5	3	97	t267	97
SY-5	3	35	19	1	1	26	39	7736	t2383
SY-6	52	79	54	18	56	32	65	479	t543
SY-7	52	79	54	18	56	32	65	479	t543
SY-8	5	4	1	4	4	6	39	1458	t2383
SY-9	3	1	1	8	1	1	1	188	t189
SY-10	3	1	1	8	1	1	1	188	t189
SY-11	1	1	1	1	1	1	1	1	t114	1
SY-12	1	1	1	1	1	1	1	1	t114	1
SY-13	3	35	19	2	20	26	39	398	t034	398
SY-14	18	95	941	2	7	15	5	7739	t7295		glp F62C→G
SY-15	6	125	213	27	13	13	1015	7757	t18636		yqiL 308C→G
SY-16	3	1	1	8	1	1	1	188	t189
SY-17	3	1	1	8	1	1	1	188	t189
SY-18	3	1	1	1	1	5	3	97	t359	97
SY-19	3	1	1	1	1	5	3	97	t359	97
SY-20	3	1	1	1	1	5	3	97	t359	97
SY-21	3	3	1	1	264	1	10	2454	t2700	8
SY-22	12	89	1	1	4	5	90	692	t2247
SY-23	3	1	1	8	1	1	1	188	t189	1
SY-24	3	1	1	8	1	1	1	188	t189	1
SY-25	6	125	213	27	13	13	1015	7757	t18636
YZ-1	6	72	50	43	49	67	59	705	t529
YZ-2	6	72	50	43	49	67	59	705	t701
CZ-1	6	72	50	43	49	67	59	705	t529
CZ-2	12	4	1	4	12	1	3	6	t529	5
CZ-3	6	72	50	43	49	67	59	705	t529
									分离地
									常德（16）；长沙（2）
									邵阳（6）；常德（5）
									邵阳（6）；常德（1）
									长沙（4）；邵阳（1）
									永州（2）；郴州（2）
									长沙（3）
									常德（3）
									常德（3）
									邵阳（3）
									长沙（1）；邵阳（2）
									常德（2）
									邵阳（2）
									长沙（1）；常德（1）
									常德（2）
									常德（1）
									郴州（1）
									邵阳（1）
									邵阳（1）
									邵阳（1）
									邵阳（1）
									长沙（1）
									邵阳（1）

## Sheet: Capsular Polysaccharide Types
Changsha	type 8	Changde	type 8	Shaoyang	type 8	Yongzhou	type 8	Chenzhou	type 8
	type 8		type 8		type 8		type 8		type 5
	type 8		type 8		type 8				type 5
	type 5		type 8		type 8
	type 5		type 8		type 8
	type 5		type 8		type 8
	type 5		type 8		type 8
	type 5		type 8		type 8
	type 5		type 8		type 8
	type 5		type 8		type 8
	type 5		type 8		type 8
	type 5		type 8		type 8
			type 8		type 8
			type 8		type 8
			type 8		type 8
			type 8		type 5
			type 8		type 5
			type 8		type 5
			type 8		type 5
			type 8		type 5
			type 8		type 5
			type 8		type 5
			type 5		type 5
			type 5		type 5
			type 5		type 5
			type 5
			type 5
			type 5
			type 5
			type 5
			type 5
			type 5
			type 5
			type 5
